# Supplementary material
Source: HighWire-hosted journal article supplement (https://bmjopen.bmj.com/content/7/9/e017389)
Supplement: inline-supplementary-material-1 [file inline-supplementary-material-1.pdf]

Appendix A

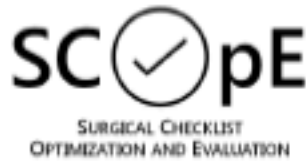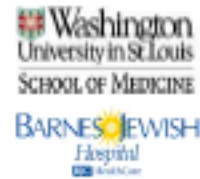

Demographics

Date:

1. What is your primary work area or unit in this hospital?

- Pod 1       Pod 2       Pod 3       Pod 4       Pod 5

1a. What is the primary surgical specialty that you work with?

- ACCS/Trauma       Cardiac       Colorectal       Endocrine/Onc       HPB  
 Min. Invasive (MIS)       Plastics/Recon       Thoracic       Transplant       Urology  
 Vascular       Other: \_\_\_\_\_

2. How long have you worked in this hospital?

- < 1 year       1-5 years       6-10 years       11-20 years       > 20 years

3. How long have you worked in your current work area/unit?

- < 1 year       1-5 years       6-10 years       11-20 years       > 20 years

4. Typically, how many hours per week do you work in this hospital?

- < 20 hours/week       20-39 hours/week       ≥ 40 hours/week (Full-time)

5. What is your staff position in this hospital?

6. How long have you worked in your current position?

- < 1 year       1-5 years       6-10 years       11-20 years       > 20 years

7. What is your gender?

**\*\*ALL SURVEY RESPONSES ARE COMPLETELY CONFIDENTIAL\*\***

**\*\*DATA WILL BE USED FOR QUALITY IMPROVEMENT PURPOSES\*\***

**For each statement below, please check the box to the right that best fits your perceptions.**

| Staff Survey |                                                                                               | 1                 | 2        | 3       | 4     | 5              |
|--------------|-----------------------------------------------------------------------------------------------|-------------------|----------|---------|-------|----------------|
|              |                                                                                               | Strongly Disagree | Disagree | Neutral | Agree | Strongly Agree |
| 8            | If you make a mistake in this unit, it is often held against you.                             |                   |          |         |       |                |
| 9            | Members of this unit are able to bring up problems and tough issues.                          |                   |          |         |       |                |
| 10           | People in this unit sometimes reject others for being different.                              |                   |          |         |       |                |
| 11           | It is safe to take a risk in this unit.                                                       |                   |          |         |       |                |
| 12           | It is difficult to ask other members of this unit for help.                                   |                   |          |         |       |                |
| 13           | No one in this unit would deliberately act in a way that undermines or hinders my efforts.    |                   |          |         |       |                |
| 14           | Working with members of this unit, my unique skills and talents are valued and utilized.      |                   |          |         |       |                |
| 15           | We are actively doing things to improve patient safety.                                       |                   |          |         |       |                |
| 16           | Mistakes have led to positive changes here.                                                   |                   |          |         |       |                |
| 17           | After we make changes to improve patient safety, we evaluate their effectiveness.             |                   |          |         |       |                |
| 18           | People support one another in this unit.                                                      |                   |          |         |       |                |
| 19           | When a lot of work needs to be done quickly, we work together as a team to get the work done. |                   |          |         |       |                |
| 20           | In this unit, people treat each other with respect.                                           |                   |          |         |       |                |
| 21           | When one area in this unit gets really busy, others help out.                                 |                   |          |         |       |                |

Staff Survey

|    |                                                                                            | 1<br>Strongly<br>Disagree | 2<br>Disagree | 3<br>Neutral | 4<br>Agree | 5<br>Strongly<br>Agree |
|----|--------------------------------------------------------------------------------------------|---------------------------|---------------|--------------|------------|------------------------|
| 22 | Staff will freely speak up if they see something that may negatively affect patient care.  |                           |               |              |            |                        |
| 23 | Staff feel free to question the decisions or actions of those with more authority.         |                           |               |              |            |                        |
| 24 | Staff are afraid to ask questions when something does not seem right.                      |                           |               |              |            |                        |
| 25 | Staff feel like their mistakes are held against them.                                      |                           |               |              |            |                        |
| 26 | When an event is reported, it feels like the person is being written up, not the problem.  |                           |               |              |            |                        |
| 27 | Staff worry that mistakes they make are kept in their personnel file.                      |                           |               |              |            |                        |
| 28 | I feel burned out from my work.                                                            |                           |               |              |            |                        |
| 29 | I feel already tired when I get up in the morning and have to face another day on the job. |                           |               |              |            |                        |
| 30 | I feel frustrated by my job.                                                               |                           |               |              |            |                        |
| 31 | I feel like I'm at the end of the rope.                                                    |                           |               |              |            |                        |
| 32 | Generally speaking, I am very satisfied with this job.                                     |                           |               |              |            |                        |
| 33 | I am generally satisfied with the kind of work I do in this job.                           |                           |               |              |            |                        |
| 34 | I frequently think of quitting this job.                                                   |                           |               |              |            |                        |

### Overall Perceptions of Safety

|    |                                                                           | 1<br>Strongly<br>Disagree | 2<br>Disagree | 3<br>Neutral | 4<br>Agree | 5<br>Strongly<br>Agree |
|----|---------------------------------------------------------------------------|---------------------------|---------------|--------------|------------|------------------------|
| 35 | Patient safety is never sacrificed to get more work done.                 |                           |               |              |            |                        |
| 36 | Our procedures and systems are good at preventing errors from happening.  |                           |               |              |            |                        |
| 37 | It is just by chance that more serious mistakes don't happen around here. |                           |               |              |            |                        |
| 38 | We have patient safety problems in this unit.                             |                           |               |              |            |                        |

### Patient Safety Grade

39. Please give your unit an overall grade on patient safety.

Excellent       Very Good       Acceptable       Poor       Failing

### Additional Feedback

Please share any additional comments.

---

---

---

---

---

---

---

---

Thank you for taking the time to fill out our survey. We rely on your feedback to help us improve the care that we provide to patients and our work environment. Your input is greatly appreciated.

#### QUESTIONS?

Please contact Jennifer Yu at [yuj@wudosis.wustl.edu](mailto:yuj@wudosis.wustl.edu) for additional information on the SCOpE Project.  
Department of Surgery – Patient Safety Work Group

## Appendix B

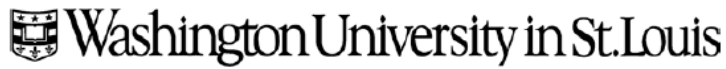

Human Research Protection Office  
FWA00002284

Barnes Jewish Hospital  
St. Louis Children's Hospital  
Washington University

July 7, 2016

Claire Ridley, MD  
Anesthesiology

Re: HRPO number: n/a  
Project Title: TeamSTEPPS [Team Strategies and Tools to Enhance Performance and Patient Safety]  
Funding Source: Departmental

Dear Dr. Ridley,

The Washington University Human Research Protection Office (HRPO) reviewed your project and determined that it does not involve activities that are subject to Institutional Review Board (IRB) oversight.

HRPO complies with federal regulations of the Department of Health and Human Services (HHS) and the Food and Drug Administration (FDA) which limit IRB review and approval to any activity that represents *research involving human participants* (HHS) or a *clinical investigation of a test article* involving one or more *human participants* (FDA). (See HRPO Policies & Procedures Section II.G. for complete definitions.)

Because you are leading a quality improvement project to implement the TeamSTEPPS program in the Division of Cardiothoracic Anesthesiology, this activity is not considered to meet federal definitions under the jurisdiction of an IRB and therefore falls outside the purview of the HRPO.

Continuing review of this activity is not necessary. However, if activities change such that they may be considered to meet the above definitions, please contact HRPO before implementing those changes.

If further information is necessary, or if you believe we have misunderstood the intent or scope of your planned activity, please contact our office at (314) 747-6800.

Sincerely,

A handwritten signature in black ink that reads "Mitchell Saulisbury-Robertson".

Mitchell Saulisbury-Robertson  
Manager- Expedited Team
